1 **Similarities and differences between IL11 and IL11RA1 knockout mice for**  
2 **lung fibro-inflammation, fertility and craniosynostosis**

3

4

5 Benjamin Ng<sup>1,2†</sup>, Anissa A. Widjaja<sup>1†</sup>, Sivakumar Viswanathan<sup>1</sup>, Jinrui Dong<sup>1</sup>, Sonia P.  
6 Chothani<sup>1</sup>, Stella Lim<sup>1</sup>, Shamini G. Shekeran<sup>1</sup>, Jessie Tan<sup>1,2</sup>, Sebastian Schafer<sup>1,2</sup>,  
7 Stuart A. Cook<sup>1,2,3,4\*</sup>

8

9 <sup>1</sup>Cardiovascular and Metabolic Disorders Program, Duke-National University of  
10 Singapore Medical School, Singapore.

11 <sup>2</sup>National Heart Research Institute Singapore, National Heart Centre Singapore,  
12 Singapore.

13 <sup>3</sup>MRC-London Institute of Medical Sciences, Hammersmith Hospital Campus, London,  
14 UK

15 <sup>4</sup>National Heart and Lung Institute, Imperial College, London, UK.

16

17 †These authors contributed equally to this work.

18

19 \*Corresponding author

20 Stuart A. Cook

21 Email: [stuart.cook@duke-nus.edu.sg](mailto:stuart.cook@duke-nus.edu.sg)

22

## 23 **Abstract**

24 Genetic loss of function (LOF) in *IL11RA* infers IL11 signaling as important for fertility,  
25 fibrosis, inflammation and craniosynostosis. The impact of genetic LOF in *IL11* has not  
26 been characterized. We generated IL11-knockout (*Il11<sup>-/-</sup>*) mice, which are born in normal  
27 Mendelian ratios, have normal hematological profiles and are protected from bleomycin-  
28 induced lung fibro-inflammation. Noticeably, baseline IL6 levels in the lungs of *Il11<sup>-/-</sup>*  
29 mice are lower than those of wildtype mice and are not induced by bleomycin damage,  
30 placing IL11 upstream of IL6. Lung fibroblasts from *Il11<sup>-/-</sup>* mice are resistant to pro-  
31 fibrotic stimulation and show evidence of reduced autocrine IL11 activity. *Il11<sup>-/-</sup>* female  
32 mice are infertile. Unlike *Il11ra1<sup>-/-</sup>* mice, *Il11<sup>-/-</sup>* mice do not have a craniosynostosis-like  
33 phenotype and exhibit mildly reduced body weights. These data highlight similarities  
34 and differences between LOF in *IL11* or *IL11RA* while establishing further the role of  
35 IL11 signaling in fibrosis and stromal inflammation.

36

## 37 **Introduction**

38 Interleukin 11 (IL11) was originally described as a factor important for hematopoiesis,  
39 notably platelet production, but more recently found to drive fibro-inflammatory  
40 disorders<sup>1</sup>. IL11 is a member of the IL6 family of cytokines, which share the gp130  
41 coreceptor, but while IL6 has been studied in very great detail with an armamentarium  
42 of genetic tools to dissect its function, IL11 remains poorly characterised<sup>1</sup>.

43

44 It is apparent from the published literature that the majority of our understanding  
45 of the biology associated with loss-of-function (LOF) in IL11 signaling is inferred from  
46 studies of *IL11RA* mutant humans or mice<sup>1</sup>. The field of IL11 biology has lacked a  
47 mouse genetic model specific for IL11 LOF, which represents a gap in our  
48 understanding. This is important as, in the case of the family member IL6, there are  
49 both similarities and differences between effects of LOF in the *IL6* cytokine as  
50 compared to LOF in its cognate receptor alpha chain (*IL6RA*)<sup>2,3</sup>. As such, it is possible  
51 that the phenotype of *IL11RA* LOF may not map precisely to IL11 function. Furthermore,  
52 studies of *IL11RA1* LOF have been conducted in a single mouse strain and there are  
53 additional genes in the targeted locus, which is a potential shortcoming.

54

55 Based on the genetic studies of *IL11RA* mutants, IL11 signaling is thought  
56 important for a number of phenotypes. *Il11ra1*-deleted female mice are infertile<sup>4</sup> and  
57 mutation in *Il11ra1* in the mouse is associated with incompletely penetrant snout  
58 displacement and tooth abnormalities, a craniosynostosis-like syndrome<sup>5</sup>. Several  
59 human studies have identified individuals with *IL11RA* mutations who have features of  
60 craniosynostosis, joint laxity, scoliosis and delayed tooth eruption<sup>5-7</sup>. Unlike mice,  
61 female humans with mutations in *IL11RA* appear fertile<sup>8</sup>. In keeping with this, at the  
62 level of the general population there is no negative selection against predicted loss-of-

63 function mutations in *IL11RA*, suggesting such mutations are not detrimental for  
64 replicative capacity<sup>9</sup>.

65

66 Here, we report the generation of mice with germline deletion of *Il11* that we  
67 characterise at baseline and in the context of pro-fibrotic stimulation *in vitro* and *in vivo*.  
68 We report similarities and differences between the phenotypes of *Il11*<sup>-/-</sup> and *Il11ra1*<sup>-/-</sup>  
69 mice.

70

## 71 **Results**

### 72 **Generation and gross anatomical characterization of *Il11*-knockout mice.**

73 Three separate transcripts of mouse *Il11* have been annotated  
74 (ENSMUSG00000004371) and using Crispr/Cas9, we deleted Exon 2 to 4 of the  
75 longest transcript (ENSMUST00000094892.11: *Il11*-201). This deletion causes a  
76 reading frame shift after the first two amino acids of IL11 resulting in a mutant 62 amino  
77 acids peptide that does not align to any known peptide sequences resulting in the  
78 inactivation of all known transcripts (**Fig. 1A**). *Il11*-knockout mice (*Il11*<sup>-/-</sup>) were  
79 generated on a C57BL/6J background and genotypes were determined by sequencing  
80 and PCR (**Fig. 1B**). To address whether the mutant alleles resulted in the loss of *Il11*  
81 RNA expression, we isolated total RNA from whole lung tissue from *Il11*<sup>-/-</sup> mice and did  
82 not observe any detectable expression of *Il11* RNA by RT-qPCR in *Il11*<sup>-/-</sup> mutants (**Fig.**  
83 **1C**). We observed a slight (5-7% lower) but statistically significant reduction in body  
84 weights of male and female *Il11*<sup>-/-</sup> mice (10-12 weeks old) as compared to age and  
85 gender matched wild-type controls (**Fig. 1D**), which has not been reported in *Il11ra1*<sup>-/-</sup>  
86 mice of a similar age.

87

88 It is reported that approximately 40-50% of *Il11ra1*<sup>-/-</sup> mice display twisted snouts,  
89 a craniosynostosis-like phenotype<sup>10</sup>. We assessed the skulls of adult *Il11*<sup>-/-</sup> (*n*=19) and  
90 wild-type (*n*=23) mice (>12 weeks of age) and *Il11ra1*<sup>-/-</sup> mice (*n*=12), all on the same  
91 C57BL/6J background. We observed macroscopic snout deformities in 42% of *Il11ra1*<sup>-/-</sup>  
92 mice (5 out of 12 mice), similar to the published incidence<sup>10</sup>. Unlike *Il11ra1*<sup>-/-</sup> mice, we  
93 did not observe significant differences in the proportions of *Il11*<sup>-/-</sup> mice with snout  
94 deformities as compared to wild-type controls (*P*=0.64) (**Fig. 1E**). Further analysis  
95 revealed that there was no significant difference in the degree of sideward deviation of  
96 snout growth in *Il11*<sup>-/-</sup> mice as compared to wild-type mice, unlike *Il11ra1*<sup>-/-</sup> mice that  
97 were deviated (**Fig. 1F**). In gross anatomy studies, the indexed organ-to-body weight  
98 ratios of the heart, lung, liver, kidney, spleen and pancreas were comparable in *Il11*<sup>-/-</sup>  
99 and wild-type mice (**Fig. 1G-L**).

100

101 **Female *Il11*-knockout mice are infertile.**

102 Deletion of *Il11ra1* in mice leads to female infertility due to defective embryo  
103 implantation related to abnormal placental decidualization, whereas *Il11ra1*<sup>-/-</sup> males are  
104 fertile<sup>4,11,12</sup>. Intercrosses of heterozygotes (*Il11*<sup>+/-</sup>) gave rise to viable and apparently  
105 normal homozygous mutant (*Il11*<sup>-/-</sup>) mice in the expected Mendelian ratios (**Fig. 2A**). We  
106 determine whether maternal *Il11* expression is required for fertility by mating  
107 homozygous (*Il11*<sup>-/-</sup>) female mice with male mice of variable *IL11* genotype (*Il11*<sup>+/+</sup>,  
108 *Il11*<sup>+/-</sup> or *Il11*<sup>-/-</sup>) and found that female mice deficient for *Il11* never had a detectable  
109 pregnancy nor gave birth to offspring (**Fig. 2B**), which mirrors the infertility phenotype of  
110 homozygous *Il11ra1*<sup>-/-</sup> female mice<sup>4</sup>. Crossing homozygous (*Il11*<sup>-/-</sup>) male mice with  
111 either wild-type (*Il11*<sup>+/+</sup>) or heterozygous (*Il11*<sup>+/-</sup>) female mice resulted in viable offspring  
112 of expected Mendelian ratios. However, litter sizes derived from *Il11*<sup>-/-</sup> male mice were  
113 significantly smaller as compared to intercrosses of heterozygotes (**Fig. 2C**). Hence,  
114 similar to germline loss of *Il11ra1*, the loss of *Il11* expression results in female infertility  
115 and appears to affect male fertility, directly or indirectly, in mice.

116

### 117 **Blood hematology and chemistry profiles are normal in *Il11*-knockout mice.**

118 We evaluated the hematological profile of adult *Il11*<sup>-/-</sup> mice (10-14 weeks of age) and  
119 observed that null mice had normal peripheral red and white blood cell counts as well as  
120 normal platelet counts and volumes as compared to wild-type mice (**Table 1**). Likewise,  
121 we profiled serum chemistry and observed normal levels of serum markers of liver  
122 function (albumin, alanine aminotransferase, total bilirubin), kidney function (blood urea  
123 nitrogen, sodium and potassium) and bone turnover (alkaline phosphatase, calcium and  
124 phosphate) in *Il11*<sup>-/-</sup> mice (**Table 1**). These data indicate that *Il11*<sup>-/-</sup> mice have normal  
125 blood hematological and chemistry profiles under normal physiological conditions.

126

### 127 **IL11 is required for myofibroblast differentiation.**

128 We previously found that TGFβ1-induced myofibroblast transdifferentiation was  
129 impaired in *Il11ra1*<sup>-/-</sup> lung fibroblasts<sup>13</sup>. To examine whether the loss of the endogenous  
130 IL11 autocrine feed-forward loop similarly perturbed fibroblast activation, we stimulated  
131 lung fibroblasts from *Il11*<sup>-/-</sup> mice with recombinant mouse TGFβ1 or IL11 (5 ng/ml; 24  
132 hours) and monitored fibroblast activation using automated high-throughput  
133 immunofluorescence imaging and Sirius red-based quantification of secreted collagen.  
134 In keeping with the data from *Il11ra1*-deleted fibroblasts, the differentiation of *Il11*<sup>-/-</sup>  
135 fibroblasts into ACTA2<sup>+ve</sup> and COL1A1 expressing myofibroblasts following TGFβ1  
136 stimulation was significantly diminished (**Fig. 3A-B**). Cell proliferation (as determined by  
137 EdU<sup>+ve</sup> staining) and secreted collagen levels into the culture supernatant were also  
138 significantly reduced in *Il11*<sup>-/-</sup> fibroblasts following TGFβ1 stimulation (**Fig. 3C-D**).

139

140 We next addressed whether disruption of the IL11 locus prevented IL11 protein  
141 expression by performing ELISA on culture supernatants and found that IL11 protein

142 was not expressed by *Il11*<sup>-/-</sup> lung fibroblasts at baseline or after TGFβ1 stimulation (**Fig.**  
143 **3E**). Interestingly, recombinant mouse IL11 (5ng/ml) did not fully restore pro-fibrotic  
144 phenotypes in *Il11*<sup>-/-</sup> fibroblasts (**Fig. 3A-D**). We assessed the expression of IL11RA in  
145 *Il11*<sup>-/-</sup> lung fibroblasts by immunofluorescence staining and detected comparable levels  
146 of IL11RA expression between *Il11*<sup>-/-</sup> and wild-type cells (**Fig. 3F**). This suggests that  
147 the autocrine loop of IL11 in the local environs of the cell is of greater importance for  
148 pro-fibrotic activity than exogenous IL11.

### 149 **Bleomycin-induced pulmonary fibrosis is attenuated in *Il11*-knockout mice.**

150 We recently showed that IL11 expression is elevated in the lung after bleomycin (BLM)-  
151 induced injury and that BLM-induced lung fibrosis is attenuated in *Il11ra1*<sup>-/-</sup> mice<sup>14</sup>. To  
152 determine if the genetic deletion of *Il11* provided similar protection, we challenged *Il11*<sup>-/-</sup>  
153 mice with a single dose of BLM oropharyngeally, and assessed the lungs 14 days  
154 thereafter (**Fig. 4A**). By gross morphology analysis, we observed reduced macroscopic  
155 lung damage in *Il11*<sup>-/-</sup> mice than that seen in wild-type mice (**Fig. 4B**). Consistent with  
156 this, blinded histological analysis of Masson's trichrome stained lung sections showed  
157 that *Il11*<sup>-/-</sup> mice had reduced parenchymal disruption and fibrosis (**Fig. 4C-D**). These  
158 changes were associated with significantly lower total lung hydroxyproline (collagen)  
159 content in *Il11*<sup>-/-</sup> mice (**Fig 4E**).

160  
161  
162 Evaluation of fibrotic gene expression in lung lysates showed reduced RNA  
163 levels of extracellular matrix and protease genes such as *Col1a1*, *Col1a2*, *Fn1*, *Mmp2*  
164 and *Timp1* in BLM-challenged *Il11*<sup>-/-</sup> mice as compared to wild-type mice (**Fig. 4F-J**).  
165 Reduced expression of several inflammatory response genes (such as *Il1b*, *Il6* and  
166 *Ccl2*) were also seen in the lungs of *Il11*<sup>-/-</sup> mice following BLM injury (**Fig. 4K-M**).

167  
168 Western blot analysis showed that IL11 protein expression was strongly  
169 upregulated in the lungs of BLM-injured wild-type mice and was not expressed at all in  
170 the lungs of *Il11*<sup>-/-</sup> mice at all, as expected (**Fig. 5A**). Furthermore, in BLM-treated *Il11*<sup>-/-</sup>  
171 mice, lung protection was accompanied by reduced pulmonary fibronectin and IL6  
172 protein expression (**Fig. 5A**) and reduced ERK activation (**Fig. 5B**). Notably, lung IL6  
173 levels in *Il11*<sup>-/-</sup> mice were lower than wild type control levels in the absence of lung  
174 injury. These data show that *Il11*<sup>-/-</sup> mice are protected from BLM-induced lung fibrosis  
175 and inflammation, similar to *Il11ra1*<sup>-/-</sup> mice, while confirming the importance of IL11-  
176 stimulated ERK activation for these phenotypes<sup>14,15</sup>.

### 177 178 **Discussion**

179 Here we provide a phenotypic description of mice with germline deletion of *Il11* and  
180 explore how this relates to the phenotypes of *Il11ra1*-null mice. We show that IL11  
181 signaling in *Il11*<sup>-/-</sup> mice is important for fibrotic phenotypes in fibroblasts *in vitro* and lung

182 fibrosis *in vivo*. These data, taken together with recent studies of *Il11ra1*<sup>-/-</sup> mice and the  
183 use of anti-IL11 or anti-IL11RA antibodies in mouse models of fibrosis<sup>13,14,16</sup>, firmly  
184 establish IL11 signaling as of central importance for fibrosis.

185

186 *Il11ra1*<sup>-/-</sup> mice have normal hematopoiesis at baseline and after bone marrow or  
187 hemolytic stress<sup>11</sup> and long term use of neutralizing anti-IL11 or anti-IL11RA antibodies  
188 have no effect on blood counts in mice<sup>16</sup>. In agreement with mouse data, there is no  
189 description of hematological abnormalities in patients with *IL11RA1* mutations<sup>17</sup>. While  
190 IL11 is still considered by some to have a role in hematopoiesis, the data shown here in  
191 *Il11*<sup>-/-</sup> mice provide a further line of evidence that IL11 is unrelated to this biology,  
192 although we did not study bone marrow stress.

193

194 It was surprising to observe differences in skull morphology between *Il11*<sup>-/-</sup> and  
195 *Il11ra1*<sup>-/-</sup> genotypes. These differences are unlikely to be accounted for by genetic  
196 factors as both strains are maintained on C57Bl6/J backgrounds. The fact that *Il11*<sup>-/-</sup>  
197 mice do not have snout deformities implies that this is unrelated to the loss of IL11  
198 signaling *per se*. However, a biallelic non-synonymous variant in *IL6ST*, which results  
199 in a selective loss of IL11-signaling, conferred a craniosynostosis phenotype, which  
200 replicated in a mouse model<sup>18</sup>. Intriguingly, while LOF mutations in *IL11* are common in  
201 the general population they have not been associated with craniosynostosis despite  
202 large scale sequencing projects<sup>7</sup> whereas *IL11RA* mutations are widely reported<sup>5,6</sup>.  
203 These data suggest the effect of IL11 signaling on craniosynostosis phenotypes is  
204 nuanced and/or differs depending on whether *IL11RA* or *IL11* is disrupted.

205

206 There are parallels between the variant phenotypes between *Il11ra1*- and *Il11*-  
207 deficient mice and those seen for *Il6*- and *Il6ra*-deficient mice. For instance,  
208 physiologically important immune phenotypes associated with loss of canonical IL6-  
209 mediated JAK/STAT signaling are seen with both *Il6*- or *Il6ra* genotypes. However,  
210 dissimilar ERK-mediated wound healing phenotypes are only seen in *Il6ra* mutants,  
211 which are dominant over *Il6* LOF effects (i.e. IL6-independent)<sup>3</sup>. Furthermore, *Il6* or *Il6ra*  
212 mutant mice also have different responses to experimental models of colitis<sup>2</sup>.

213

214 A possible explanation for the difference between alpha chain and ligand mutants  
215 could relate to reduced/no interaction of mutant alpha chains with the gp130. Thus, LOF  
216 in one alpha chain (e.g. IL6R) might reduce its competition for the shared gp130  
217 receptor and potentiate the activity of another gp130-binding alpha chain (e.g. IL11RA).  
218 This premise could account for the increased ERK signaling seen in IL6RA mutant  
219 mice, perhaps reflecting increased IL11-driven ERK signaling<sup>3</sup>. The idea of diminished  
220 interaction of mutant alpha chains with gp130 is suggested further by human genetics:

221 autosomal recessive mutations in gp130 are associated with craniosynostosis, whereas  
222 autosomal dominant variation is not<sup>19,20</sup>.

223

224 There is variation in reported fertility phenotypes associated with LOF mutations  
225 in the IL11 pathway in mice and humans (**Table 2**). Female mice lacking *IL11RA1* are  
226 infertile due to defective decidualization in response to embryo implantation<sup>4,12</sup>. In  
227 contrast, women with homozygous *IL11RA* variants appear able to reproduce<sup>8</sup> which  
228 could be explained by species differences in decidualization<sup>21</sup>. In this study, we found  
229 that *Il11*<sup>-/-</sup> female mice are infertile, consistent with a recent report<sup>22</sup>. Interestingly, we  
230 observed a reduction in litter sizes from *Il11*<sup>-/-</sup> male mice, suggesting additional male-  
231 related effects of IL11 on fertility.

232

233 While IL11 is increasingly recognized as important for tissue fibrosis, more recent  
234 data has shown a role for IL11 signaling in inflammatory fibroblasts and stromal  
235 immunity in the lung and colon<sup>23-25</sup>. Fitting with this, we found that *Il11*<sup>-/-</sup> mice were  
236 protected from BLM-induced lung inflammation with lower *Il1b*, *Il6* and *cc12* mRNA  
237 levels. More strikingly, at the protein level, IL6 was not only not upregulated in the  
238 injured lung of *Il11*<sup>-/-</sup> mice but IL6 levels were also lower in *Il11*<sup>-/-</sup> mouse lungs at  
239 baseline.

240

241 In conclusion, loss of IL11 signaling due to mutation in either *IL11* or *IL11RA* is  
242 protective against fibrosis that relates, in part, to reduced autocrine IL11 activity in  
243 myofibroblasts<sup>13</sup>. However, the craniosynostosis phenotypes seen in *IL11RA* deficient  
244 humans and mice are not apparent in *Il11*<sup>-/-</sup> mice, suggesting that this may not be  
245 directly due to defective IL11 signaling. While IL6 is one of the most studied genes in  
246 the literature, increasing evidence supports a role for IL11 upstream of IL6 that has  
247 potential large implications. To facilitate further analysis of IL11 LOF the *Il11*<sup>-/-</sup> mice  
248 described in this manuscript have been made available to the scientific community at  
249 the Jackson Laboratories repository.

250

## 251 **Materials and Methods**

252 **Animal studies.** All experimental procedures were approved and conducted in  
253 accordance with guidelines set by the Institutional Animal Care and Use Committee at  
254 SingHealth (Singapore) and the SingHealth Institutional Biosafety Committee and with  
255 the recommendations in the *Guidelines on the Care and Use of Animals for Scientific*  
256 *Purposes of the National Advisory Committee for Laboratory Animal Research*  
257 (NACLAR). Animals were maintained in a specific pathogen-free environment and given  
258 ad libitum access to food and water.

259 **Generation of *Il11*-knockout mice.** Crispr/Cas9 technique was used to knock out the  
260 *IL11* gene (ENSMUST00000094892.11: *Il11*-201 transcript). Specific single guide RNA  
261 (sgRNA) sequences with recognition sites on introns 1 and 4 along with Cas9 were  
262 microinjected into fertilized C57BL/6J zygotes, and subsequently transferred into  
263 pseudopregnant mice (Shanghai Model Organisms, Centre, Inc). It is predicted that this  
264 deletion would cause a shift in the reading frame from the splicing of coding sequences  
265 present within exons 1 and 5, resulting in the generation of a mutant peptide (62 amino  
266 acids in length) that does not align to that of known proteins. This effectively results in  
267 the inactivation of the gene. Successfully generated F0 mice were identified by PCR  
268 and sequencing and further backcrossed to wild type C57BL/6J mice and maintained on  
269 this background. Wild-type allele was identified by a 670 bp PCR product using  
270 genotyping primer sequences as follows: P1: 5'-CGGGGGCGGACGGGAGACG-3' and  
271 P2: 5'-CCAGGAGGGATCGGGTTAGGAGAA-3'. Whereas, mutant (knockout) alleles  
272 were identified by a second PCR reaction using primers P1 and P3: 5'-  
273 CAGCTAGGGACGACACTTGAGAT-3'.

274 **Bleomycin model of lung injury.** The bleomycin model of lung fibrosis was performed as  
275 previously described<sup>14</sup>. Briefly, female mice (8-10 weeks of age) were anesthetized by  
276 isoflurane inhalation and subsequently administered a single dose of bleomycin (Sigma-  
277 Aldrich) oropharyngeally at 0.5 mg/kg body weight in a volume of saline not exceeding  
278 50  $\mu$ l per mouse. Uninjured animals received equal volumes of saline as sham controls.  
279 Mice were sacrificed 14 days post-bleomycin administration and lungs were collected  
280 for downstream analysis.

281 **Analysis of craniosynostosis-like snout phenotype.** *Il11ra1*<sup>-/-</sup> mice on a C57BL/6J  
282 background were originally described in <sup>11</sup> and obtained from The Jackson's laboratory.  
283 For the analysis of skull phenotypes of *Il11*<sup>-/-</sup>, *Il11ra1*<sup>-/-</sup> and wild-type mice, the heads of  
284 both male and female adult mice (>12 weeks of age) were dissected and cleaned by  
285 removing the soft tissue surrounding the skull. The bones were fixed in 10% neutral  
286 buffered formalin. Classification was performed by visual scoring of the presence  
287 (craniosynostosis-like phenotype) or absence (no phenotype) of twisted snouts by two  
288 independent investigators blinded to genotypes, and concordant scores were obtained  
289 between the investigators. Deviation from linear nasal bone growth was determined by  
290 assessing the angle between the tip of the snout and the sagittal suture at the base of  
291 the frontal bone by ImageJ software analysis (v1.8).

292 **Hematologic analysis.** Blood was collected by cardiac puncture from anesthetized  
293 male and female adult mice (10-14 weeks of age). Differential red and white cell counts,  
294 hematocrit, hemoglobin and platelet counts were determined using the VetScan HM5  
295 hematology analyzer (Abaxis Inc.). Blood chemistry profiles from male and female mice



296 were determined using the VetScan VS2 system, partnered with the VetScan  
297 comprehensive diagnostic profile discs (Abraxis Inc.).

298 **Reagents.** Recombinant proteins: Mouse TGF $\beta$ 1 (7666-MB, R&D Systems), mouse  
299 IL11 (rmlIL11, UniProtKB: P47873, GenScript). Antibodies: anti-smooth muscle actin  
300 (ab7817, abcam), anti-Collagen I (ab34710, abcam), anti-IL11RA (ab125015, abcam),  
301 goat anti-mouse Alexa Flour 488-conjugated secondary antibody (ab150113, abcam),  
302 goat anti-rabbit Alexa Flour 488-conjugated secondary antibody (ab150077, abcam),  
303 DAPI (D1306, Thermo Fisher Scientific). Primary antibodies for Western blots include:  
304 anti-Fibronectin antibody (ab2413, Abcam); anti-IL6 (12912, Cell Signaling); anti-p-  
305 ERK1/2 (4370, Cell Signaling), anti-ERK1/2s (4695, Cell Signaling) and anti-GAPDH  
306 (2118, Cell Signaling). Monoclonal anti-IL11 antibody (X203), generated in our previous  
307 study<sup>14</sup>, was used to detect IL11 protein expression in tissue lysates. Secondary  
308 antibodies for Western blots include: anti-rabbit HRP (7074, Cell Signaling) or anti-  
309 mouse HRP (7076, Cell Signaling).

310 **Primary mouse lung fibroblasts cultures.** Primary mouse lung fibroblasts were  
311 isolated from 8-12 weeks old *Il11*<sup>+/+</sup> and wild-type mice as previously described<sup>14</sup>.  
312 Tissues were minced, digested for 30 minutes with mild agitation at 37°C in DMEM  
313 (11995-065, Gibco) containing 1% penicillin/streptomycin (P/S, 15140-122, Gibco) and  
314 0.14 Wunsch U ml<sup>-1</sup> Liberase (5401119001, Roche). Cells were subsequently cultured  
315 in complete DMEM supplemented with 10% fetal bovine serum (10500, Hyclone), 1%  
316 P/S, in a humidified atmosphere at 37 °C and 5% CO<sub>2</sub>. Fresh medium was renewed  
317 every 2-3 days. Fibroblasts were allowed to explant from the digested tissues and  
318 enriched via negative selection with magnetic beads against mouse CD45 (leukocytes),  
319 CD31 (endothelial) and CD326 (epithelial) using a QuadroMACS separator (Miltenyi  
320 Biotec) according to the manufacturer's protocol. All experiments were carried out at low  
321 cell passage (<P3) and cells were cultured in serum-free media for 16 hours prior to  
322 stimulation.

323 **Operetta high-content imaging and analysis.** Immunofluorescence imaging and  
324 quantification of fibroblast activation were performed on the Operetta High Content  
325 Imaging System (PerkinElmer) as previously described<sup>13,14</sup>. Briefly, lung fibroblasts  
326 were seeded in 96-well CellCarrier black plates (PerkinElmer) and following  
327 experimental conditions, the cells were fixed in 4% paraformaldehyde (Thermo Fisher  
328 Scientific) and permeabilized with 0.1% Triton X-100 in phosphate-buffered saline  
329 (PBS). EdU-Alexa Fluor 488 was incorporated using Click-iT EdU Labelling kit (C10350,  
330 Thermo Fisher Scientific) according to manufacturer's protocol. The cells were then  
331 incubated with primary antibodies (anti-ACTA2 or anti-COL1A1) and visualized using  
332 anti-mouse or anti-rabbit Alexa Flour 488-conjugated secondary antibodies. Plates were  
333 scanned and images were collected with the Operetta high-content imaging system

334 (PerkinElmer). Each treatment condition was run in duplicate wells, and 14 fixed fields  
335 were imaged and analysed per condition. The percentage of activated myofibroblasts  
336 (ACTA2<sup>+</sup> cells) and proliferating cells (EdU<sup>+</sup> cells) was quantified using the Harmony  
337 software version 3.5.2 (PerkinElmer). Quantification of COL1A1 immunostaining was  
338 performed using the Columbus software (version 2.7.2, PerkinElmer), and fluorescence  
339 intensity was normalized to cell area.

340 **Lung histology analysis.** Freshly dissected lungs from *Il1*<sup>-/-</sup> and wild-type mice were  
341 fixed in 10% formalin overnight, dehydrated and embedded in paraffin and sectioned for  
342 Masson's trichrome staining as described previously<sup>14</sup>. Histological analysis for fibrosis  
343 was performed blinded to genotype and treatment exposure according to Ashcroft  
344 scoring method<sup>24</sup>.

#### 345 **Quantification of collagen content in culture supernatant and lung tissue.**

346 Detection of soluble collagen in the supernatant of lung fibroblasts cultures were  
347 performed as previously described<sup>14</sup>. Briefly, the cell culture supernatant was  
348 concentrated using a Polyethylene glycol concentrating solution (90626, Chondrex) and  
349 collagen content was quantified using a Sirius red collagen detection kit (9062,  
350 Chondrex), according to the manufacturer's protocol. Total lung hydroxyproline content  
351 in the right lobes of mice were measured as previously described<sup>14</sup>, using the  
352 Quickzyme Total Collagen assay kit (Quickzyme Biosciences).

353 **ELISA.** Detection of secreted IL11 into the supernatant of lung fibroblast cultures was  
354 performed using the mouse IL-11 DuoSet ELISA kit according to manufacturers'  
355 instructions.

356 **RT-qPCR.** Total RNA was extracted from snap-frozen mouse lung tissues using Trizol  
357 reagent (Invitrogen) followed by RNeasy column (Qiagen) purification and cDNA was  
358 prepared using an iScript cDNA synthesis kit (Biorad) following manufacturer's  
359 instructions. Quantitative RT-PCR gene expression analysis was performed with  
360 QuantiFast SYBR Green PCR kit (Qiagen) using a StepOnePlus (Applied Biosystem).  
361 Relative expression data were normalized to *Gapdh* mRNA expression using the  $2^{-\Delta\Delta Ct}$   
362 method. Primers sequences used for are as follows: *Il11* 5'-  
363 AATTCCCAGCTGACGGAGATCACA-3' and 5'-TCTACTCGAAGCCTTGTCAGCACA-  
364 3'; *Col1a1* 5'-GGGGCAAGACAGTCATCGAA-3' and 5'-GTCCGAATTCCTGGTCTGGG-  
365 3'; *Col1a2* 5'-AGGATTGGTCAGAGCAGTGT-3' and 5'-TCCACAACAGGTGTCAGGGT-  
366 3'; *Fn1* 5'-CACCCGTGAAGAATGAAGA-3' and 5'-GGCAGGAGATTTGTTAGGA-3';  
367 *Mmp2* 5'-ACAAGTGGTCCGCGTAAAGT-3' and 5'-AAACAAGGCTTCATGGGGGC-3';  
368 *Timp1* 5'-GGGCTAAATTCATGGGTTC-3' and 5'-CTGGGACTTGTTGGGCATATC-3';  
369 *Ccl2* 5'-GAAGGAATGGGTCCAGACAT-3' and 5'-ACGGGTCAACTTCACATTCA-3'; *Il6*  
370 5'-CTCTGGGAAATCGTGGAAAT-3' and 5'-CCAGTTTGGTAGCATCCATC-3'; *Il1b* 5'-

371 CACAGCAGCACATCAACAAG-3' and 5'- GTGCTCATGTCCTCATCCTG-3'; *Gapdh* 5'-  
372 CTGGAAAGCTGTGGCGTGAT-3 and 5'- GACGGACACATTGGGGGTAG-3'.

373 **Western blot analysis.** Total proteins were extracted from snap-frozen mouse lung  
374 tissues using RIPA lysis buffer (Thermo Fisher Scientific) and separated by SDS-PAGE,  
375 transferred to a PVDF membrane (Biorad), and incubated overnight with the appropriate  
376 primary antibodies. Blots were visualized using the ECL detection system (Pierce) with  
377 the appropriate secondary antibodies.

378 **Statistical analysis.** All statistical analyses were performed using Graphpad Prism  
379 (version 8). Statistical analyses were performed using two-sided Student's t-test, or  
380 ANOVA as indicated in the figure legends. For comparisons between multiple treatment  
381 groups, *P* values were corrected for multiple hypothesis testing using Sidak's test,  
382 Tukey's test or Bonferonni's post-hoc test. *P* values <0.05 were considered statistically  
383 significant.

384 **Data availability.** All data generated and analysed in the current study are presented in  
385 the manuscript or available from the corresponding author upon request.

386

## 387 References

- 388 1. Cook, S. A. & Schafer, S. Hiding in Plain Sight: Interleukin-11 Emerges as a Master  
389 Regulator of Fibrosis, Tissue Integrity, and Stromal Inflammation. *Annu. Rev. Med.*  
390 **71**, 263–276 (2020).
- 391 2. Sommer, J. *et al.* Interleukin-6, but not the interleukin-6 receptor plays a role in  
392 recovery from dextran sodium sulfate-induced colitis. *Int. J. Mol. Med.* **34**, 651–660  
393 (2014).
- 394 3. McFarland-Mancini, M. M. *et al.* Differences in wound healing in mice with  
395 deficiency of IL-6 versus IL-6 receptor. *J. Immunol.* **184**, 7219–7228 (2010).
- 396 4. Robb, L. *et al.* Infertility in female mice lacking the receptor for interleukin 11 is due  
397 to a defective uterine response to implantation. *Nat. Med.* **4**, 303–308 (1998).
- 398 5. Nieminen, P. *et al.* Inactivation of IL11 signaling causes craniosynostosis, delayed

- 399 tooth eruption, and supernumerary teeth. *Am. J. Hum. Genet.* **89**, 67–81 (2011).
- 400 6. Keupp, K. *et al.* Mutations in the interleukin receptor IL11RA cause autosomal  
401 recessive Crouzon-like craniosynostosis. *Mol Genet Genomic Med* **1**, 223–237  
402 (2013).
- 403 7. Miller, K. A. *et al.* Diagnostic value of exome and whole genome sequencing in  
404 craniosynostosis. *J. Med. Genet.* **54**, 260–268 (2017).
- 405 8. Keupp, K. *et al.* Mutations in the interleukin receptor IL 11 RA cause autosomal  
406 recessive Crouzon-like craniosynostosis. *Molecular genetics & genomic medicine*  
407 **1**, 223–237 (2013).
- 408 9. Karczewski, K. J. *et al.* The mutational constraint spectrum quantified from variation  
409 in 141,456 humans. *Nature* **581**, 434–443 (2020).
- 410 10. Agthe, M. *et al.* Mutations in Craniosynostosis Patients Cause Defective  
411 Interleukin-11 Receptor Maturation and Drive Craniosynostosis-like Disease in  
412 Mice. *Cell Rep.* **25**, 10–18.e5 (2018).
- 413 11. Nandurkar, H. H. *et al.* Adult mice with targeted mutation of the interleukin-11  
414 receptor (IL11Ra) display normal hematopoiesis. *Blood* **90**, 2148–2159 (1997).
- 415 12. Bilinski, P., Roopenian, D. & Gossler, A. Maternal IL-11R $\alpha$  function is required for  
416 normal decidua and fetoplacental development in mice. *Genes Dev.* (1998).
- 417 13. Schafer, S. *et al.* IL-11 is a crucial determinant of cardiovascular fibrosis. *Nature*  
418 **552**, 110–115 (2017).
- 419 14. Ng, B. *et al.* Interleukin-11 is a therapeutic target in idiopathic pulmonary fibrosis.  
420 *Sci. Transl. Med.* **11**, (2019).
- 421 15. Ng, B. *et al.* Fibroblast-specific IL11 signaling drives chronic inflammation in murine

- 422 fibrotic lung disease. *FASEB J.* (2020) doi:10.1096/fj.202001045RR.
- 423 16. Widjaja, A. A. *et al.* Inhibiting Interleukin 11 Signaling Reduces Hepatocyte Death  
424 and Liver Fibrosis, Inflammation, and Steatosis in Mouse Models of Non-Alcoholic  
425 Steatohepatitis. *Gastroenterology* (2019) doi:10.1053/j.gastro.2019.05.002.
- 426 17. Brischoux-Boucher, E. *et al.* IL11RA-related Crouzon-like autosomal recessive  
427 craniosynostosis in 10 new patients: Resemblances and differences. *Clin. Genet.*  
428 **94**, 373–380 (2018).
- 429 18. Schwerd, T. *et al.* A variant in IL6ST with a selective IL-11 signaling defect in  
430 human and mouse. *Bone Research* **8**, 1–12 (2020).
- 431 19. Schwerd, T. *et al.* A biallelic mutation in IL6ST encoding the GP130 co-receptor  
432 causes immunodeficiency and craniosynostosis. *J. Exp. Med.* **214**, 2547–2562  
433 (2017).
- 434 20. Béziat, V. *et al.* Dominant-negative mutations in human IL6ST underlie hyper-IgE  
435 syndrome. *J. Exp. Med.* **217**, (2020).
- 436 21. Dimitriadis, E., Salamonsen, L. A. & Robb, L. Expression of interleukin-11 during  
437 the human menstrual cycle: coincidence with stromal cell decidualization and  
438 relationship to leukaemia inhibitory factor and prolactin. *Mol. Hum. Reprod.* **6**, 907–  
439 914 (2000).
- 440 22. Deguchi, Y. *et al.* Generation of and characterization of anti-IL-11 antibodies using  
441 newly established Il11-deficient mice. *Biochem. Biophys. Res. Commun.* **505**, 453–  
442 459 (2018).
- 443 23. Smillie, C. S. *et al.* Intra- and Inter-cellular Rewiring of the Human Colon during  
444 Ulcerative Colitis. *Cell* **178**, 714–730.e22 (2019).

445 24. Ashcroft, T., Simpson, J. M. & Timbrell, V. Simple method of estimating severity of  
446 pulmonary fibrosis on a numerical scale. *J. Clin. Pathol.* **41**, 467–470 (1988).

447

#### 448 **Acknowledgements**

449 We would like to acknowledge N. Ko and B. L. George for their support. This research is  
450 supported by the National Medical Research Council (NMRC), Singapore STaR awards  
451 (NMRC/STaR/0029/2017), MOH-CIRG18nov- 0002, Goh Foundation, Tanoto  
452 Foundation to S.A.C. A.A.W. is supported by NMRC/OFYIRG/0053/2017. S.S is  
453 supported by NMRC/OFYIRG18nov-0014.

454

#### 455 **Author Contributions**

456 B.N., A.A.W. and S.A.C. designed the study. B.N., A.A.W., S.V., J.D., S.L., S.G.S. and  
457 J.T. performed experiments. B.N., A.A.W., S.V. and S.P.C. analyzed the data. B.N.,  
458 A.A.W., S.S. and S.A.C. prepared and wrote the manuscript with input from the other  
459 co-authors.

460

#### 461 **Additional Information**

##### 462 **Competing interests:**

463 S.A.C. and S. S. are co-inventors of the patent applications (WO2017103108,  
464 WO2017103108 A2, WO 2018/109174 A2, WO 2018/109170 A2) for “Treatment of  
465 fibrosis”. A.A.W., S. S. and S.A.C. are co-inventors of the patent applications  
466 (GB1900811.9, GB 1902419.9, GB1906597.8) for “Treatment of hepatotoxicity,  
467 nephrotoxicity, and metabolic diseases”. S. S., S. A.C. and B.N. are co-inventors of the  
468 patent application (WO/2019/073057) for “Treatment of SMC mediated disease”. S.A.C.  
469 and S.S. are co-founders and shareholders of Enleofen Bio PTE LTD. All other co-  
470 authors declare no competing interests.

471

472 **Figures:**  
473

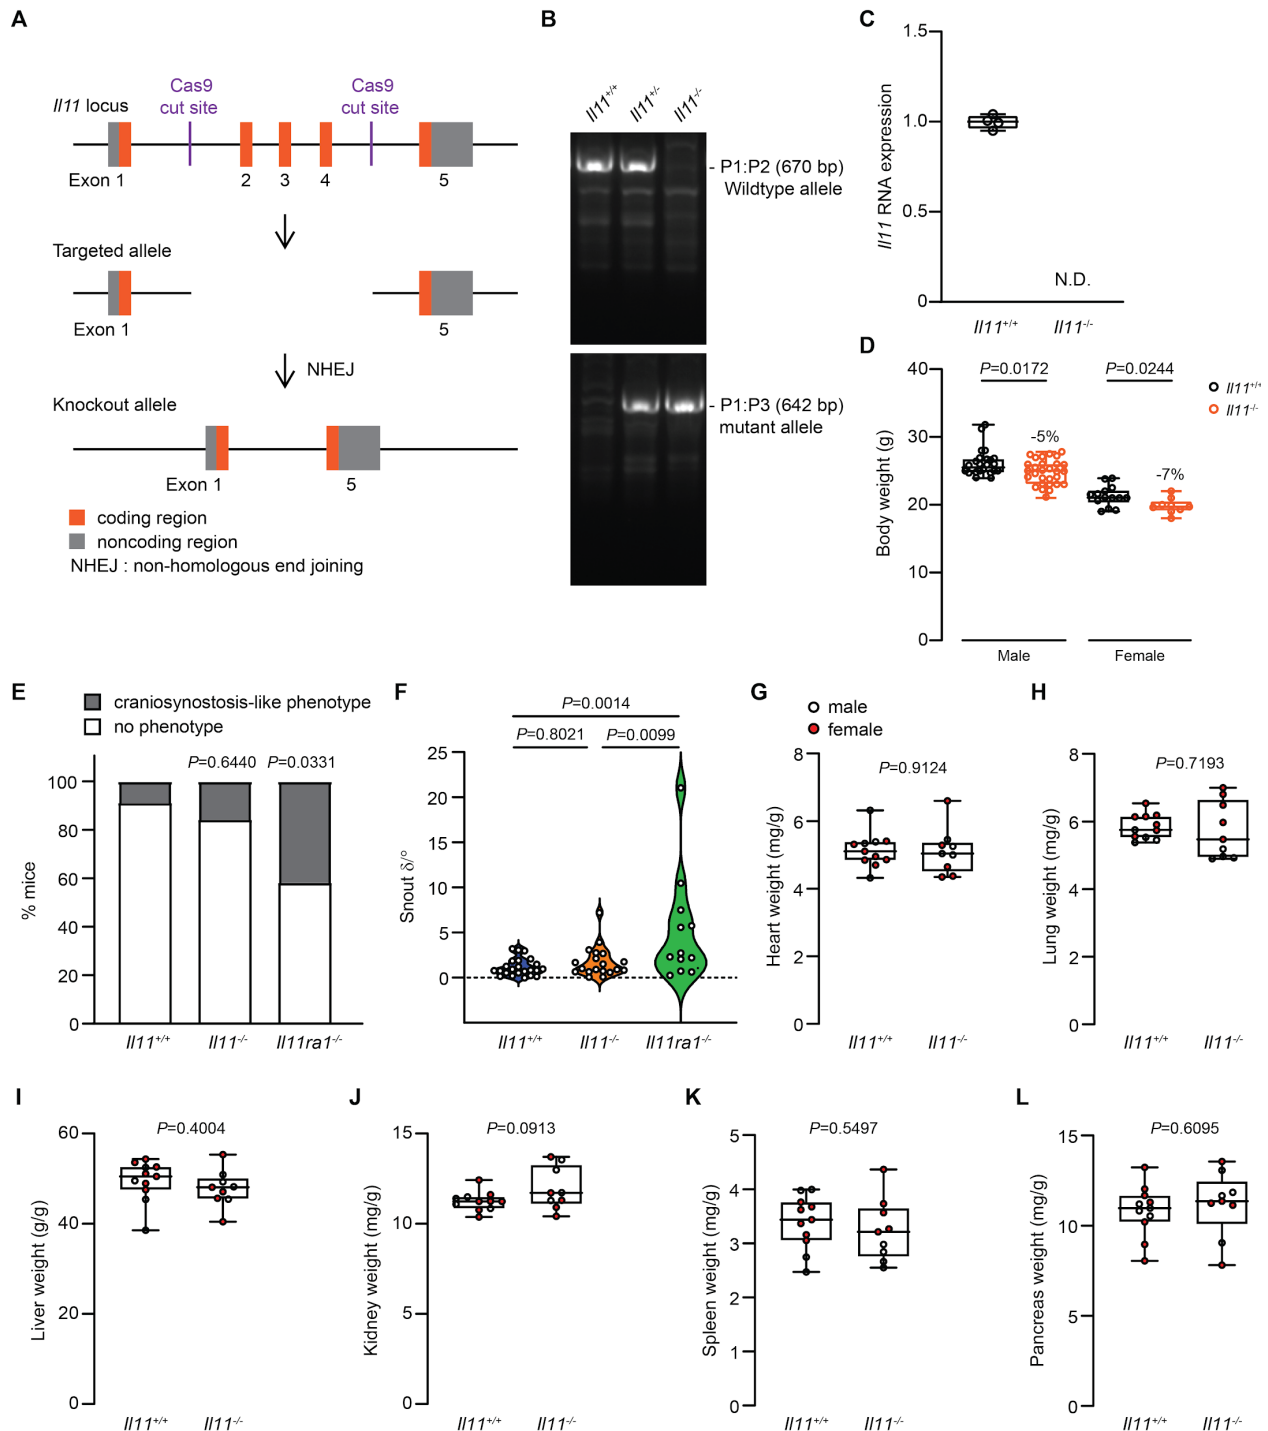

474 **Figure 1. Generation and anatomical characterization of *Il11*-knockout mice.** (A) Schematic design  
475 of Crispr/Cas9 mediated deletion of exons 2 to 4 of the mouse *Il11* locus. (B) Representative genotyping  
476 of *Il11*-deficient or wild-type mice, showing a wild-type band (670 bp) and mutant band (642 bp). (C) RT-  
477 qPCR of *Il11* expression in whole lung tissue from wild-type and *Il11*<sup>-/-</sup> mice ( $n=4$ ). N.D., not detected. (D)  
478 Body weight of 10-12 week old wild-type (male  $n=26$ ; female  $n=14$ ) and *Il11*<sup>-/-</sup> mice (male  $n=29$ ; female  
479

480 *n*=9). (E) Proportion of mice with craniosynostosis-like phenotype and (F) the degree of deviation from  
481 linear snout growth ( $\delta/\circ$ ) was determined in *Il11<sup>-/-</sup>* mice as compared to wild-type and *Il11ra1<sup>-/-</sup>* mice (*Il11<sup>+/+</sup>*  
482 *n*=23, *Il11<sup>-/-</sup>* *n*=19, *Il11ra1<sup>-/-</sup>* *n*=12). (G) Heart weight-, (H) lung weight-, (I) liver weight-, (J) kidney weight-,  
483 (K) spleen weight- and (L) pancreas weight-to-bodyweight indices of male and female *Il11<sup>-/-</sup>* and wild-type  
484 mice (10-14 weeks of age). Data shown in C, D, G-L as: centre line, median value; box edges, 25th and  
485 75th percentiles; whiskers, minimum and maximum values; E are shown as stacked bar graphs; F shown  
486 as violin plot. *P* values were determined by Fisher's exact test in panel E, ANOVA (Tukey's test) in F and  
487 Student's *t*-test in D, G-L.  
488



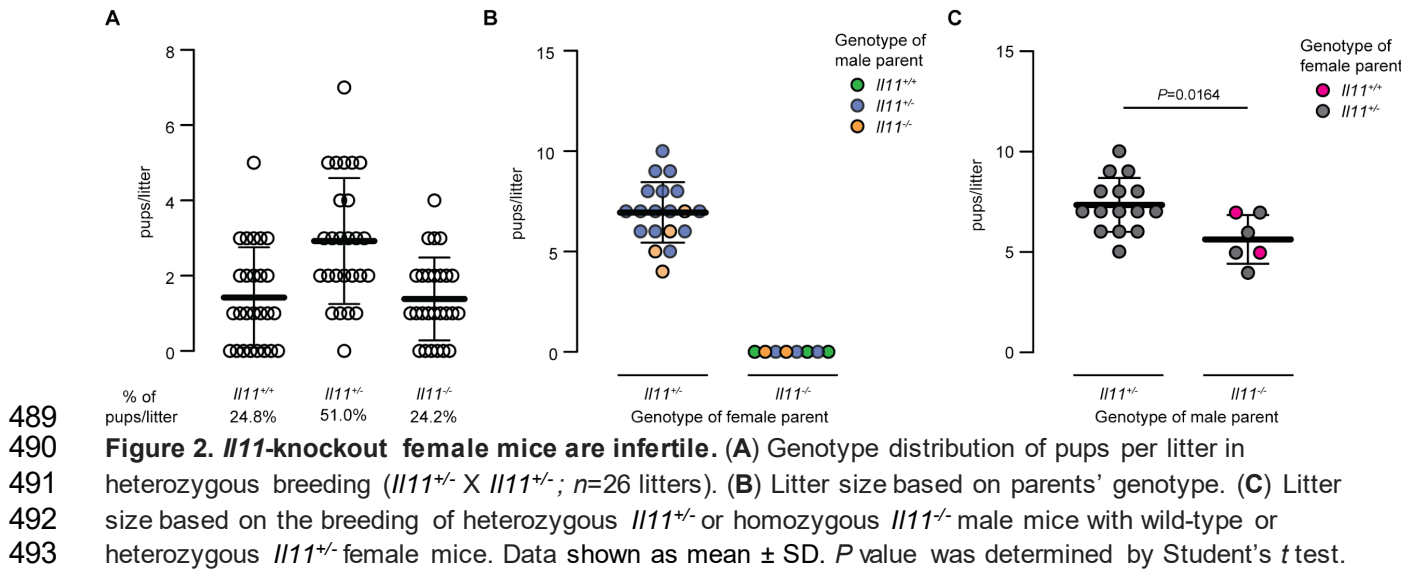

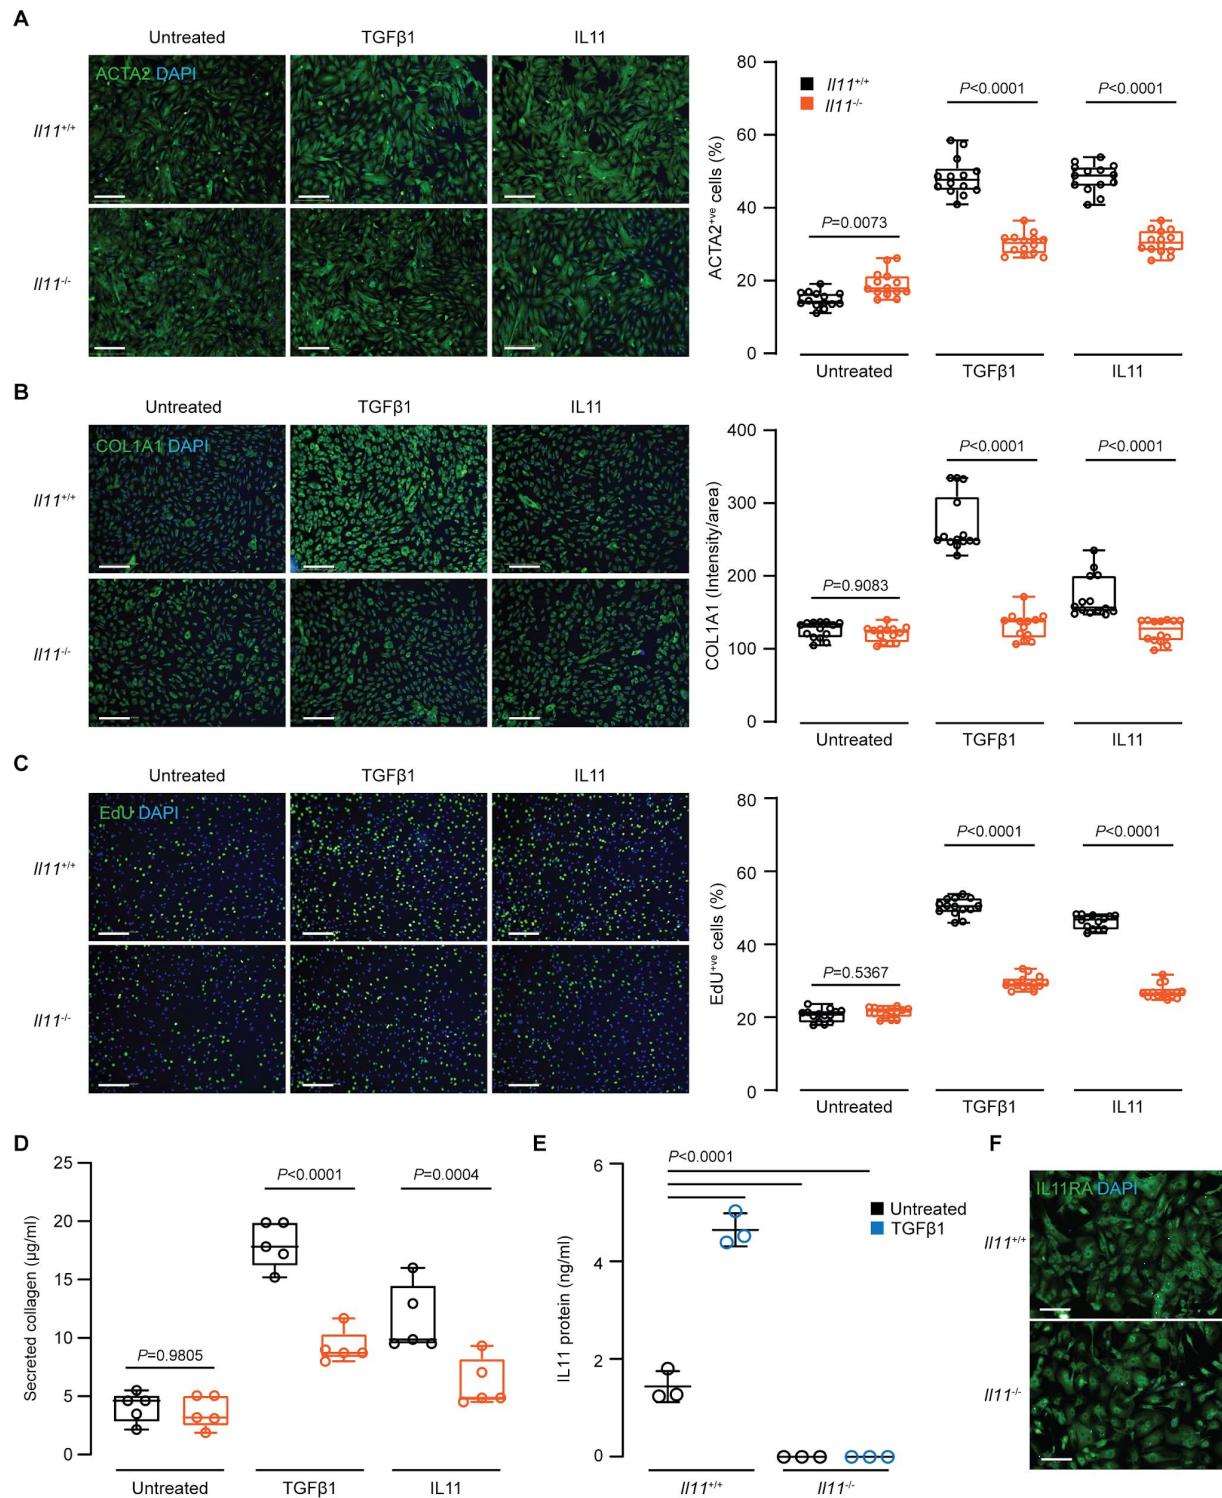

494  
495  
496  
497  
498  
499  
500

**Figure 3. Reduced activation of primary lung fibroblasts from *I11*-knockout mice.** Automated immunofluorescence quantification of (A) ACTA2<sup>+</sup> cells, (B) COL1A1 expression (intensity/area) and (C) EdU<sup>+</sup> cells in TGFβ1- or IL11-treated lung fibroblasts from *I11*<sup>-/-</sup> or wild-type mice (5 ng/ml, 24h). One representative dataset from two independent biological experiments is shown (14 measurements per condition per experiment). (D) Secreted collagen concentrations in supernatant of cells treated as described in A-B were quantified (*n*=5). (E) Secreted IL11 in culture supernatant from TGFβ1-treated

501 lung fibroblasts from *Il11<sup>-/-</sup>* or wild-type mice (5 ng/ml, 24h;  $n=3$ ). (F) Immunofluorescence images of  
502 IL11RA expression in lung fibroblasts from *Il11<sup>-/-</sup>* or wild-type mice. Scale bars: 200  $\mu\text{m}$ . Data in A-D are  
503 shown as: centre line, median value; box edges, 25th and 75th percentiles; whiskers, minimum and  
504 maximum values; and shown as mean  $\pm$  SD in E. *P* values in A-D were determined by ANOVA (Sidak's  
505 test) and by ANOVA (Tukey's test) in E.  
506

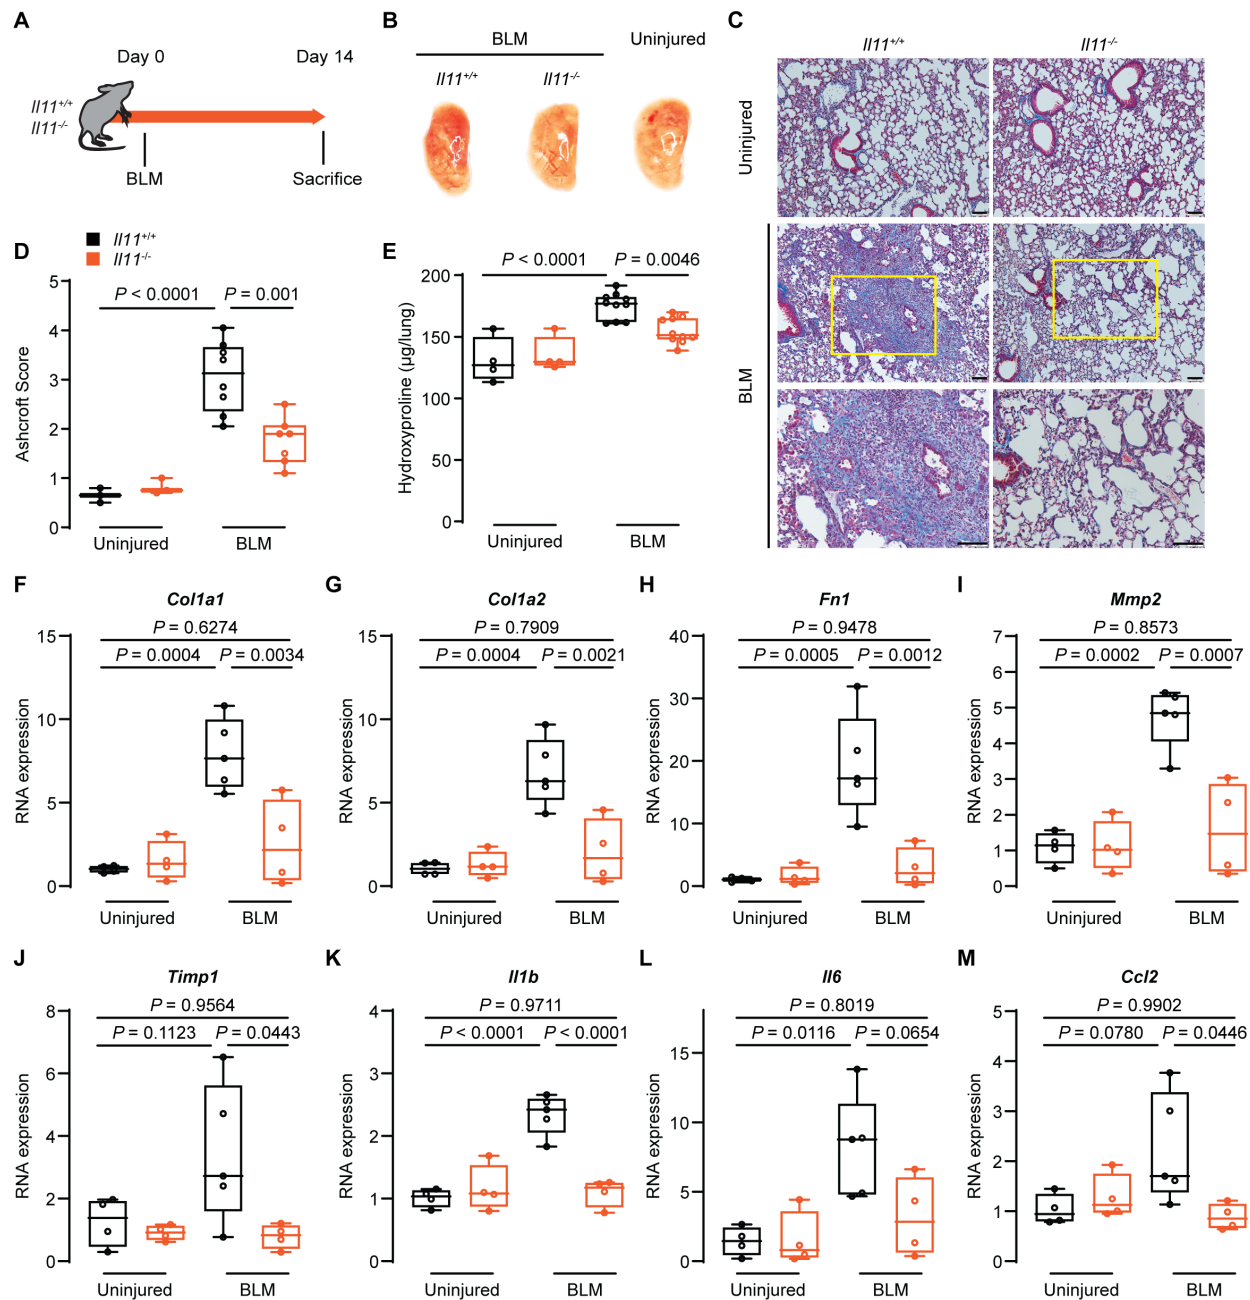

**Figure 4. Bleomycin-induced pulmonary fibrosis is attenuated in *I11*-knockout mice.** (A) Schematic showing the induction of lung fibrosis in *I11*<sup>-/-</sup> and wild-type mice. A single dose of bleomycin (BLM) was administered oropharyngeally and the mice were sacrificed 14 days post-BLM. (B) Representative gross lung anatomy of *I11*<sup>-/-</sup> and wild-type mice 14 days post-BLM. (C) Masson's trichrome staining of lung sections, (D) histology assessment of fibrosis and (E) total lung hydroxyproline content of *I11*<sup>-/-</sup> and wild-type mice 14 days post-BLM. Scale bars: 100 µm. Relative RNA expression of (F) *Col1a1*, (G) *Col1a2*, (H) *Fn1*, (I) *Mmp2*, (J) *Timp1*, (K) *I11b*, (L) *I16* and (M) *Ccl2* in lung lysates from *I11*<sup>-/-</sup> and wild-type mice 14 days post-BLM ( $n=4$ ). Data shown as: centre line, median value; box edges, 25th and 75th percentiles; whiskers, minimum and maximum values.  $P$  values were determined by ANOVA (Tukey's test).

507  
508  
509  
510  
511  
512  
513  
514  
515  
516  
517

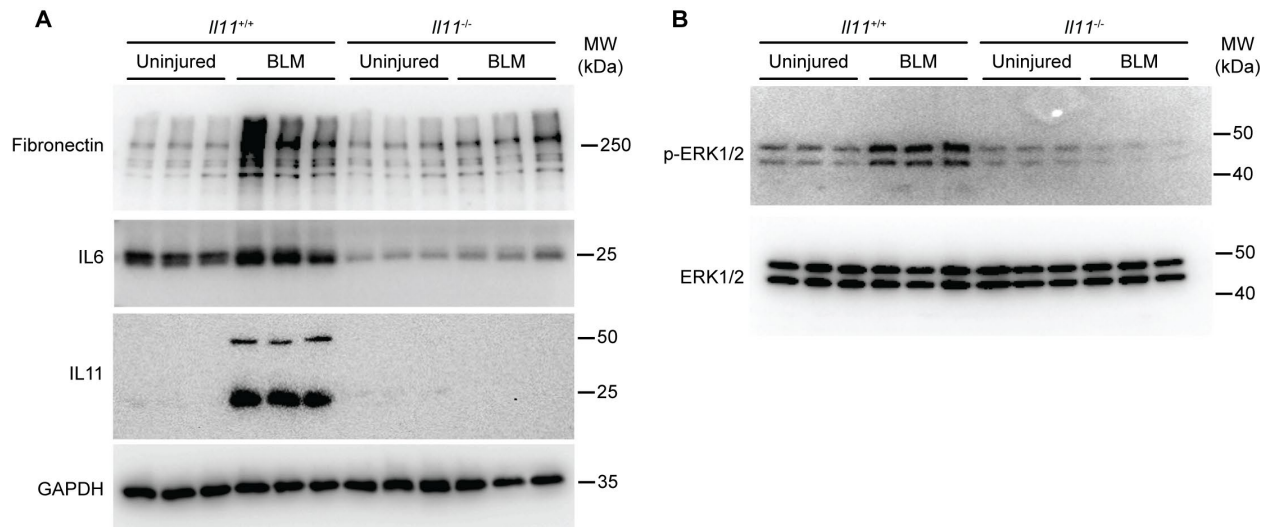

518  
519  
520  
521  
522  
523

**Figure 5. Bleomycin-induced pulmonary fibronectin, IL6 and IL11 expression and ERK activation in *Il11*-knockout and wild type mice.** Western blots of (A) fibronectin, IL6 and IL11 and (B) phosphorylated and total ERK1/2 in lung homogenates of *Il11*<sup>-/-</sup> and wild-type mice 14 days post-BLM ( $n=3$  for each genotype/condition). Uncropped blot images are shown in **Supplementary Figure 1**.

524 **Tables:**

525

526 **Table 1.** Hematology and serum metabolic profiles of *Il11<sup>-/-</sup>* mice.

| <b>Blood counts:</b>             | <b><i>Il11<sup>+/+</sup></i><br/>(n = 5)</b> | <b><i>Il11<sup>-/-</sup></i><br/>(n = 7)</b> | <b>Sig.*</b> |
|----------------------------------|----------------------------------------------|----------------------------------------------|--------------|
| WBC (10 <sup>9</sup> /L)         | 6.74 ± 2.60                                  | 6.30 ± 1.60                                  | NS           |
| Lymphocytes (10 <sup>9</sup> /L) | 5.00 ± 1.83                                  | 4.84 ± 1.67                                  | NS           |
| Monocytes (10 <sup>9</sup> /L)   | 0.23 ± 0.16                                  | 0.31 ± 0.31                                  | NS           |
| Neutrophils (10 <sup>9</sup> /L) | 1.52 ± 1.65                                  | 1.15 ± 0.98                                  | NS           |
| RBC (10 <sup>12</sup> /L)        | 10.18 ± 2.46                                 | 9.02 ± 0.21                                  | NS           |
| HGB (g/dL)                       | 11.98 ± 2.23                                 | 13.52 ± 0.43                                 | NS           |
| HCT (%)                          | 45.42 ± 12.16                                | 40.66 ± 1.16                                 | NS           |
| Platelets (10 <sup>9</sup> /L)   | 521 ± 358                                    | 387 ± 75                                     | NS           |
| Mean Platelet Volume (fl)        | 6.12 ± 0.16                                  | 6.15 ± 0.26                                  | NS           |
| <b>Serum metabolic markers:</b>  | <b><i>Il11<sup>+/+</sup></i><br/>(n = 5)</b> | <b><i>Il11<sup>-/-</sup></i><br/>(n = 6)</b> | <b>Sig.*</b> |
| Albumin (g/dL)                   | 3.34 ± 0.32                                  | 3.23 ± 0.30                                  | NS           |
| Alkaline Phosphatase (U/L)       | 89.20 ± 7.33                                 | 98.83 ± 21.15                                | NS           |
| Alanine Aminotransferase (U/L)   | 35.00 ± 20.10                                | 59.17 ± 27.69                                | NS           |
| Amylase (U/L)                    | 730 ± 142                                    | 696 ± 91                                     | NS           |
| Total Bilirubin (mg/dL)          | 0.32 ± 0.04                                  | 0.32 ± 0.04                                  | NS           |
| Blood Urea Nitrogen (mg/dL)      | 20.00 ± 5.39                                 | 19.67 ± 3.56                                 | NS           |
| Calcium (mg/dL)                  | 9.62 ± 0.16                                  | 9.67 ± 0.55                                  | NS           |
| Phosphate (mg/dL)                | 10.88 ± 2.20                                 | 10.57 ± 0.96                                 | NS           |
| Glucose (mg/dL)                  | 328 ± 108                                    | 389 ± 91.91                                  | NS           |
| Sodium (mmol/L)                  | 147 ± 1.87                                   | 143 ± 3.92                                   | NS           |
| Potassium (mmol/L)               | 5.24 ± 0.44                                  | 5.43 ± 0.67                                  | NS           |
| Total Protein (g/dL)             | 4.34 ± 0.17                                  | 4.10 ± 0.13                                  | NS           |
| Globulin (g/dL)                  | 0.98 ± 0.19                                  | 0.83 ± 0.23                                  | NS           |

Data shown as mean ± SD

\*Significance was determined using Bonferroni post-hoc test.

WBC, white blood cells; RBC, red blood cells; HGB, hemoglobin count; HCT, hematocrit; NS, non-significant.

527

528

529 **Table 2.** Fertility reported with genetic loss-of-function in IL11 signaling in mice and  
530 humans.

| Gene           | Mutation/variant                                                                                             | Gender effects                                                                                             | Reference                    |
|----------------|--------------------------------------------------------------------------------------------------------------|------------------------------------------------------------------------------------------------------------|------------------------------|
| <b>Human</b>   |                                                                                                              |                                                                                                            |                              |
| <i>IL11RA</i>  | Exon 4 donor splice site (c.479+6T>G)                                                                        | Females: fertile                                                                                           | (6)                          |
| <b>Mouse</b>   |                                                                                                              |                                                                                                            |                              |
| <i>Il6st</i>   | Gp130 p.R279Q (selective IL11 signaling deficiency)                                                          | Females: homozygous mutants have reduced litter size<br>Males: homozygous mutants have reduced litter size | (18)                         |
| <i>Il11ra1</i> | Deletion of Exons 8 to 13                                                                                    | Females: homozygous mutants are infertile due to defective decidualization<br>Males: normal fertility      | (4,11)                       |
| <i>Il11ra1</i> | Hypomorphic mutations                                                                                        | Females: fertility of homozygous mutants are severely impaired<br>Males: normal fertility                  | (12)                         |
| <i>Il11</i>    | Crispr/Cas9 frameshift in Exon 3                                                                             | Females: homozygous mutants are infertile (data not shown)<br>Males: not reported                          | (22)                         |
| <i>Il11</i>    | Crispr/Cas9 deletion of Exons 2 to 4. Frameshift from 2 <sup>nd</sup> amino acid (aa), mutant 62 aa protein. | Females: homozygous mutants are infertile<br>Males: homozygous mutants have reduced litter size            | Ng. et al. 2020 (This study) |

531
